# Supplementary material for: Calcium ion regulation by BAPTA-AM and ruthenium red improved the fertilisation capacity and developmental ability of vitrified bovine oocytes
Source: PubMed Central journal article supplement (PMC5587528; doi:10.1038/s41598-017-10907-9), 2017-09-06
Supplement: 41598_2017_10907_MOESM1_ESM.pdf [file 41598_2017_10907_MOESM1_ESM.pdf]

1 **Calcium ion regulation by BAPTA-AM and ruthenium red improved**  
2 **the fertilisation capacity and developmental ability of vitrified bovine**  
3 **oocytes**

4  
5 Na Wang<sup>1#</sup>, Hai-Sheng Hao<sup>#1</sup>, Chong-Yang Li<sup>1#</sup>, Ya-Han Zhao<sup>1</sup>, Hao-Yu Wang<sup>1</sup>, Chang-Liang  
6 Yan<sup>2</sup>, Wei-Hua Du<sup>1</sup>, Dong Wang<sup>1</sup>, Yan Liu<sup>1</sup>, Yun-Wei Pang<sup>1</sup>, Hua-Bin Zhu<sup>1</sup>, Xue-Ming Zhao<sup>1\*</sup>

7  
8 <sup>1</sup>Embryo Biotechnology and Reproduction Laboratory, Institute of Animal Sciences (IAS),  
9 Chinese Academy of Agricultural Sciences (CAAS), No. 2 Yuanmingyuan Western Road, Haidian  
10 District, Beijing 100193, P.R. China.

11 <sup>2</sup>Livestock and Poultry Import & Export Dept, China Animal Husbandry Group (CAHG), No. 188  
12 West Road, South 4th Ring Road, Beijing 100070.

13 \*Corresponding author: Xue-Ming Zhao: zhaoxueming@caas.cn

14 <sup>#</sup>These authors contributed equally to this work.

15 **SUPPLEMENTARY INFORMATION**

16 **1 Supplementary Methods**

17 **1.1 *In vitro* maturation (IVM) of oocytes**

18 For IVM, bovine ovaries collected from a local abattoir were placed in physiological saline  
19 solution containing 75 µg/mL penicillin and 50 µg/mL streptomycin and transported to the  
20 laboratory at 35 °C within 2 h. Cumulus-oocyte complexes (COCs) were aspirated from follicles  
21 with a diameter of 2–8 mm, and only those with at least three layers of compact cumulus cells  
22 were selected and used for IVM. Fifty COCs were cultured in 500 µL of IVM medium for 22–24 h  
23 in a CO<sub>2</sub> incubator (5% CO<sub>2</sub>, 38.5 °C, humidified air). The IVM medium contained Medium-199  
24 (Gibco BRL, Grand Island, NY, USA), 10 mg/mL estradiol (E<sub>2</sub>), 10 mg/mL follicle-stimulating  
25 hormone (FSH), 10% foetal bovine serum (FBS; Gibco BRL), and 10 mg/mL luteinizing hormone  
26 (LH). After IVM for 22–24 h, cumulus cells were removed from the COCs by pipetting in 0.1%  
27 (w/v) hyaluronidase for 1–2 min, and oocytes with a first polar body and uniform cytoplasm were  
28 used for subsequent experiments according to the experimental design.

29 **1.2 Preparation of open-pulled straws (OPS)**

30 Briefly, 0.25-mL plastic straws (IMV, L'Aigle, France) were heat-softened and pulled according to  
31 the method described by Vajta et al.<sup>1</sup>. The external diameter of the tips was approximately 0.23  
32 mm, and the wall thickness was approximately 0.02 mm, as measured with a microforge.

33 **1.3 Preparation of pretreatment and vitrification solutions**

34 The pretreatment solution consisted of 10% (v/v) ethylene glycol (EG), 10% (v/v) dimethyl  
35 sulfoxide (DMSO) and 3 mg/mL bovine serum albumin (BSA) in Dulbecco's phosphate-buffered

36 saline (DPBS without  $\text{Ca}^{2+}$ ). Vitrification solution consisted of 20% (v/v) EG and 20% (v/v)  
37 DMSO in FSF solution, which consisted of DPBS (without  $\text{Ca}^{2+}$ ), 300 g/L Ficoll, 0.5 M sucrose,  
38 and 20% (v/v) FBS.

39 The warming solution was 0.15 M and 0.25 M sucrose in DPBS (without  $\text{Ca}^{2+}$ ).

#### 40 **1.4 Vitrification and warming of oocytes**

41 Oocytes were vitrified by being incubated in pretreatment solution for 30 s, transferred to  
42 vitrification solution for 25 s, and then loaded into OPS and vertically plunged into liquid nitrogen  
43 ( $\text{LN}_2$ ).

44 To warm the oocytes, OPS were removed from  $\text{LN}_2$ , and the oocytes were quickly expelled and  
45 immersed in 0.25 M sucrose solution for 1 min at 38.5 °C, followed by immersion in 0.15 M  
46 sucrose for 5 min. They were washed twice and then evaluated by observing the membrane  
47 integrity and zona pellucida (ZP)<sup>2</sup>. Based on the results, only surviving oocytes were used for the  
48 experiment.

#### 49 **1.5 Analysis of the developmental potential of oocytes by parthenogenetic activation (PA)**

50 Oocytes were treated with 5  $\mu\text{M}$  of the calcium ionophore A23187 for 5 min, then transferred into  
51 2 mM 6-dimethylaminopurine for 6–8 h. After activation, the oocytes were placed into CR1aa  
52 medium<sup>3</sup> supplemented with 0.1% (w/v) BSA and cultured for 48 h. After selection of the cleaved  
53 embryos, they were counted, transferred to CR1aa medium containing 10% (v/v) FBS, and  
54 incubated for 5 days. Then, half the volume of the culture medium was replaced with fresh  
55 medium every 48 h, and the number of blastocysts was recorded on day 7.

#### 56 **1.6 Analysis of fertilisation and developmental capacities of oocytes by *in vitro* fertilisation**

57 **(IVF)**

58 IVF was performed according to the method described by Brackett and Oliphant<sup>4</sup> with some  
59 modifications. Frozen semen was thawed at 38 °C, then added to a 15-mL centrifuge tube  
60 containing 7 mL of Brackett and Oliphant (BO) medium supplemented with 2.5 mM caffeine and  
61 centrifuged at 1500 rpm for 5 min. After being washed twice, the supernatant was discarded and  
62 the precipitate was diluted with BO fertilisation medium containing 20 mg/mL heparin, 20 mg/mL  
63 BSA, 100 IU/mL penicillin, and 100 IU/mL streptomycin to obtain a final concentration of  $5 \times 10^6$   
64 sperms/mL. Finally, 20 µL of the sperm suspension was added to an 80-µL drop of BO fertilisation  
65 medium and incubated for 1.5 h. Then, 20–30 oocytes were transferred to the fertilisation medium  
66 and incubated for 6–8 h in a CO<sub>2</sub> incubator.

67 To analyse the fertilisation capacity of the oocytes, the putative zygotes were selected from the  
68 fertilisation drop and treated with 0.5% (w/v) pronase for 2 min to digest the ZP. Then, ZP-free  
69 zygotes were incubated in 10 µg/mL Hoechst-33342 for 10 min at 38.5 °C. Finally, the ZP-free  
70 zygotes were washed three times, fixed on a slide, and covered with a cover slip. The nuclei of the  
71 presumed zygotes were then observed under a fluorescence microscope (Olympus, Tokyo, Japan).

72 To analyse the developmental capacity of oocytes after IVF, 20–30 presumed zygotes were  
73 incubated in 100-µL CR1aa droplets containing 0.1% (w/v) BSA for 2 days. Cleaved oocytes were  
74 then recorded and cultured in CR1aa medium supplemented with 10% (v/v) FBS for a further 5  
75 days. Half of the volume of the medium was replaced with fresh medium every 48 h, and the  
76 blastocyst rates were determined on day 7.

### 77 **1.7 Number of blastocyst cells**

78 Bovine blastocysts collected on day 7 after PA or IVF were washed three times in DPBS (without

79  $\text{Ca}^{2+}$ ) and incubated in 10  $\mu\text{g}/\text{mL}$  Hoechst-33342 for 10 min at 38.5  $^{\circ}\text{C}$ . After being washed three  
80 times in DPBS (without  $\text{Ca}^{2+}$ ), the blastocysts were fixed on a slide, covered with a cover slip, and  
81 examined under a camera-equipped fluorescence microscope to count the number of blastocyst  
82 cells.

### 83 **1.8 Quantitative real-time polymerase chain reaction (qRT-PCR) of target genes in bovine** 84 **blastocysts**

85 According to the procedure described by Sun et al.<sup>5</sup>, the Single Cell-to-CT quantitative real-time  
86 PCR kit (Life Technologies, Carlsbad, CA, USA) and the 7900HT System (Applied Biosystems,  
87 Foster City, CA, USA) were used to detect the mRNA expression levels of target genes in the  
88 bovine blastocysts. PCR was carried out in a total volume of 10  $\mu\text{L}$ , which contained 2  $\mu\text{L}$  of  
89 complementary DNA (cDNA), 5  $\mu\text{L}$  of Fast SYBR Green Master Mix (Invitrogen), 0.2  $\mu\text{L}$  (10  $\mu\text{M}$ )  
90 of each primer, and 2.6  $\mu\text{L}$  of water to bring the volume to 10  $\mu\text{L}$ . The PCR protocol consisted of a  
91 pre-denaturation step at 95  $^{\circ}\text{C}$  for 10 min, followed by 40 cycles of 95  $^{\circ}\text{C}$  for 15 s and 60  $^{\circ}\text{C}$  for  
92 1 min. The comparative Ct ( $2^{-\Delta\Delta\text{Ct}}$ ) method<sup>6</sup> was calculated to represent the relative mRNA  
93 expression levels of the target genes. *B-Actin* was used as the reference gene, and the primers used  
94 for each gene are listed in Table S1.

95 **Supplementary References**

- 96 1. Vajta, G. et al. Open pulled straw (OPS) vitrification: a new way to reduce cryoinjuries of bovine ova and  
97 embryos. *Mol Reprod Dev.* **51**, 53–58 (1998).
- 98 2. Dinnyés, A., Dai, Y., Jiang, S. & Yang, X. High development rates of vitrified bovine oocytes following  
99 parthenogenetic activation, in vitro fertilization, and somatic nuclear transfer. *Biol Reprod.* **63**, 513–518  
100 (2000).
- 101 3. Rosenkrans, CF. Jr. & First, N. L. Effect of free amino acids and vitamins on cleavage and developmental rate  
102 of bovine zygotes in vitro. *J Anim Sci.* **72**, 434–437 (1994).
- 103 4. Brackett, B. G. & Oliphant, G. Capacitation of rabbit spermatozoa in vitro. *Biol Reprod.* **12**, 260–274 (1975).
- 104 5. Sun, W. J. et al. Exogenous glutathione supplementation in culture medium improves the bovine embryo  
105 development after in vitro fertilization. *Theriogenology.* **84**, 716–723 (2015).
- 106 6. Schmittgen, T. D. & Livak, K. J. Analyzing real-time PCR data by the comparative C(T) method. *Nat Protoc.*  
107 **3**, 1101–1108 (2008).

108

109

110

111

112

113

114 **2 Supplementary Tables**

115 Table S1. Primer sequences of detected blastocyst genes

| Gene             | Primers (5'–3')                                           | GenBank accession number |
|------------------|-----------------------------------------------------------|--------------------------|
| <i>BAX</i>       | F: TTCTGACGGCAACTTCAACTG<br>R: CTCTCGAAGGAAGTCCAATGTC     | NM_173894.1              |
| <i>BCL2L1</i>    | F: AGGAGATGCAGGTATTGGTGA<br>R: CATTGTTCCCGTAGAGTTCCA      | NM_001077486.2           |
| <i>CASPASE-3</i> | F: TAAAGAAGACCATAGCAAAAAGGAG<br>R: AGCACCCTGTCTGTCTCAATAC | NM_001077840.1           |
| <i>XIAP</i>      | F: ATACCCAAGGAACCCTGTCA<br>R: CCACCACAACAAAAGCACTG        | NM_001205592.1           |
| <i>IFN-tau</i>   | F: CTGTCTGAGGACCACATGCTAG<br>R: CATCTCCTGAGGAAGACCAAA     | AF238611.1               |
| <i>B-Actin</i>   | F: GGGAAATCGTCCGTGACATCA<br>R: GATGGTGATGACCTGCCCGT       | NM_173979                |

116 **3 Supplementary Figures**

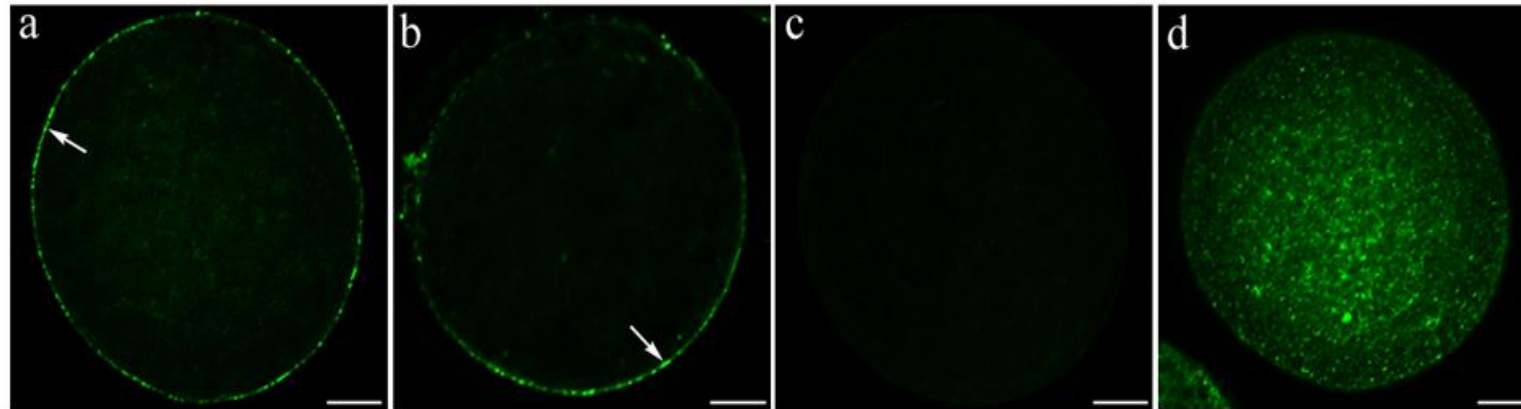

117 **Figure S1.** CG distribution in bovine oocytes stained with FITC-LCA. (a) Peripheral distribution. (b) Discontinuous peripheral distribution. (c) Completed release. (d)  
118 Homogeneous distribution (arrow indicates peripheral distribution). Scale bar = 20  $\mu\text{m}$ .

119

120

121



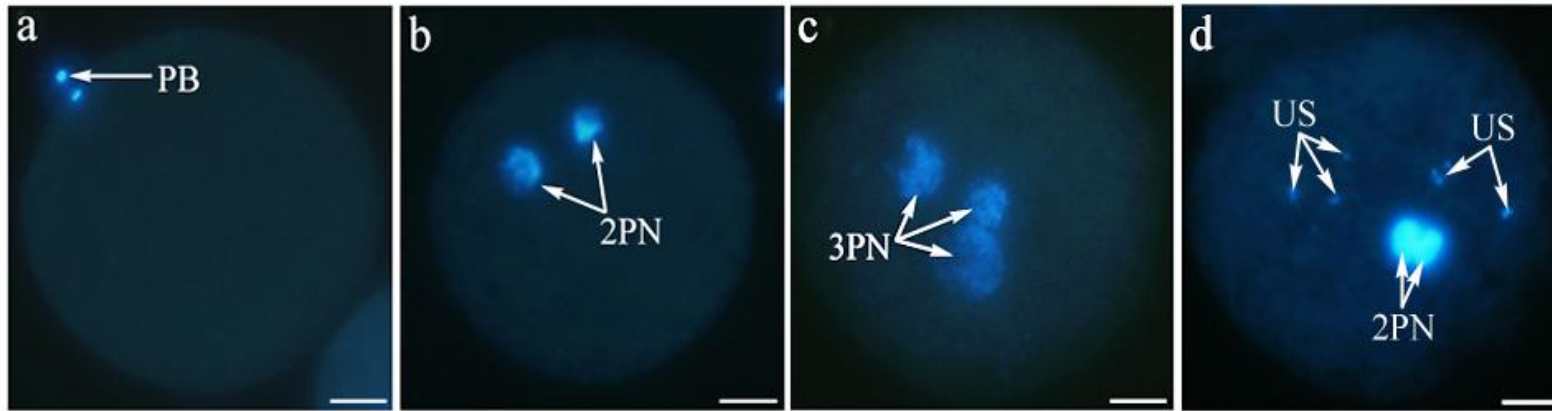

122

123 **Figure S2.** Fertilisation capacity analysis of bovine oocytes after IVF. (a) Unfertilised oocytes. (b) Monospermic oocyte. (c, d) Polyspermic oocytes. PB: polar body.

124 PN: pronuclei. US: undecondensed sperm. Scale bar = 20  $\mu$ m.

125

126

127

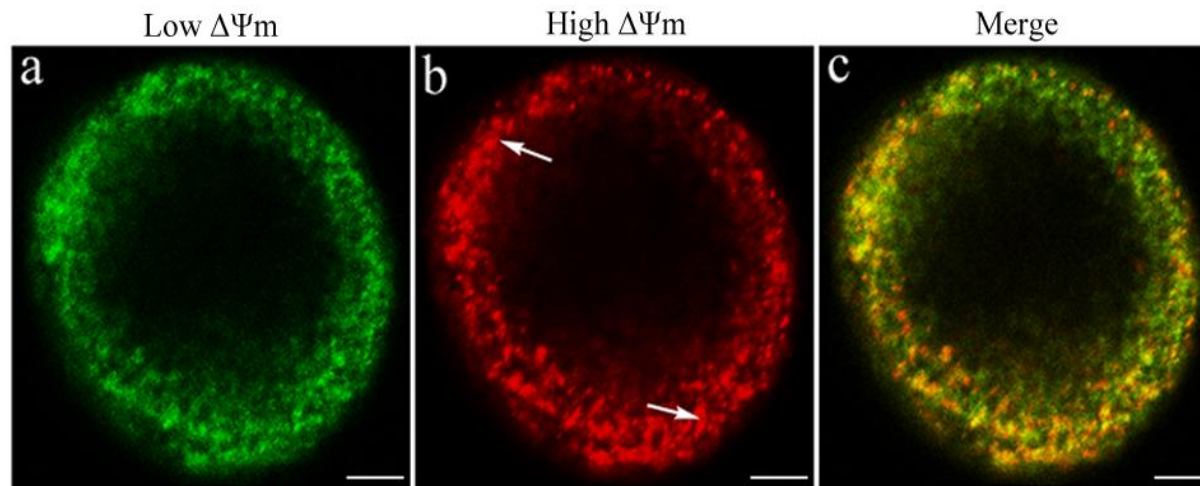

128

129 **Figure S3.**  $\Delta\Psi_m$  of bovine oocytes stained with JC-1. (a) Mitochondria with low  $\Delta\Psi_m$ . (b) Mitochondria with high  $\Delta\Psi_m$ . (c) Merging of images with green and red  
130 fluorescence. Arrows: mitochondrial clusters. Scale bar = 20  $\mu\text{m}$ .

131

132

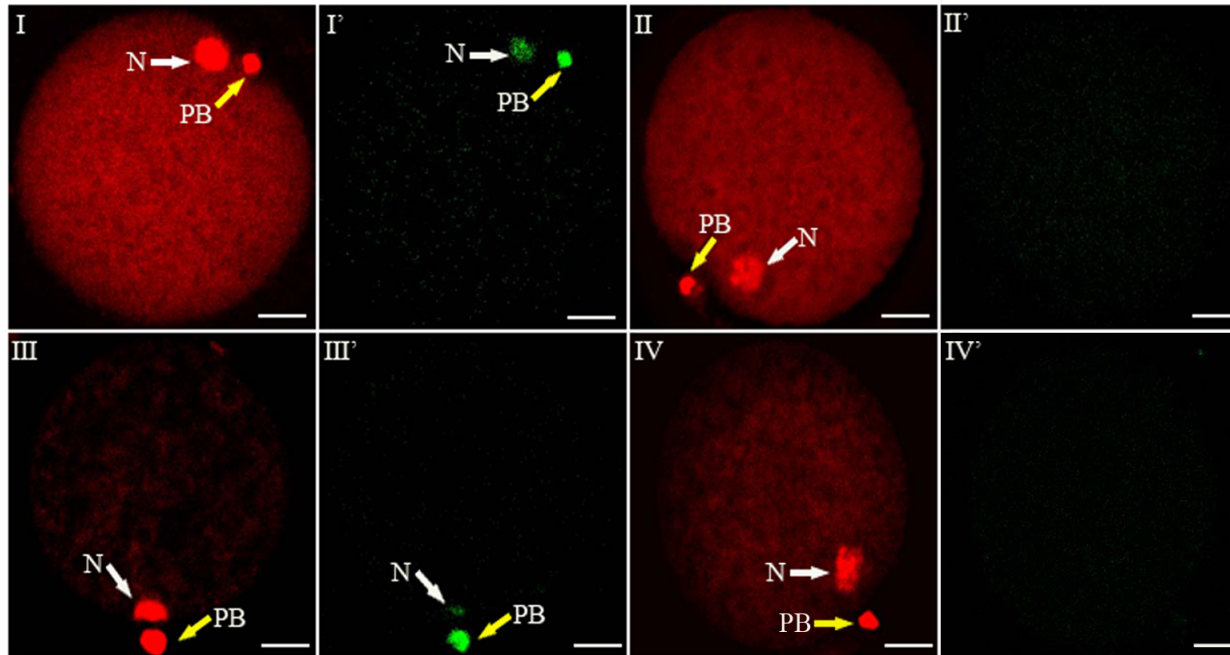

133

134 **Figure S4.** Oocytes stained with TUNEL. (I, I') TUNEL-positive control. (II, II') TUNEL- negative control. (III, III') TUNEL-positive oocyte. (IV, IV') Healthy

135 oocyte. PI staining shows nuclear DNA (red) and TUNEL staining shows DNA fragmentation (green). The DNA fragmentation signal (green) was clearly visible in

136 TUNEL-positive oocytes, but no TUNEL signal was detected in healthy oocytes. White arrowheads indicate the locations of nuclei, and yellow arrowheads indicate

137 the locations of polar bodies. Scale bar = 20  $\mu$ m.

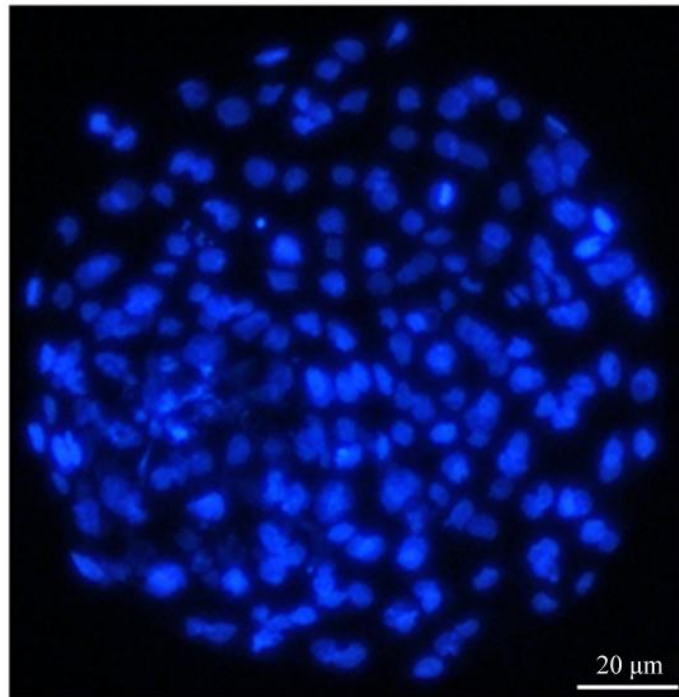

**Figure S5.** Blastocyst staining by Hoechst-33342. Scale bar = 20 μm.
